# Supplementary material for: Direct leptin action on POMC neurons regulates glucose homeostasis and hepatic insulin sensitivity in mice
Source: JCI journal article supplement (doi:10.1172/jci59816), 2012-02-13
Supplement: sd1 [file 1]

**A** Cre-reativable *Lepr* null allele

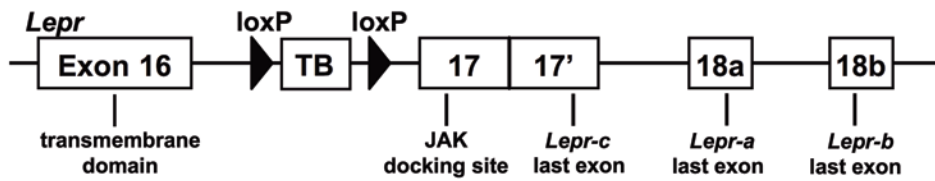

**B** Cre-reactivated *Lepr* allele

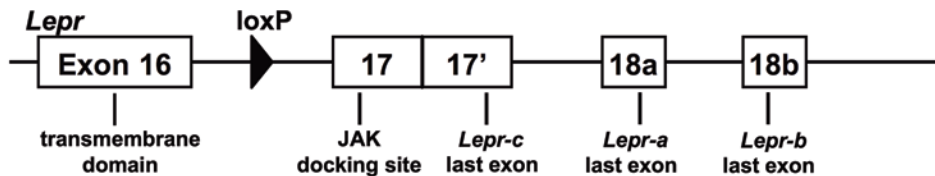

**Supplemental Figure 1** – Generation of LEPR loxTB mice. (A) Leptin receptor (*Lepr*) null mice were generated by inserting a loxP-flanked transcription blocking (TB) sequence in the *Lepr* gene. (B) Expression of Cre-recombinase removes the TB sequence and restores expression.

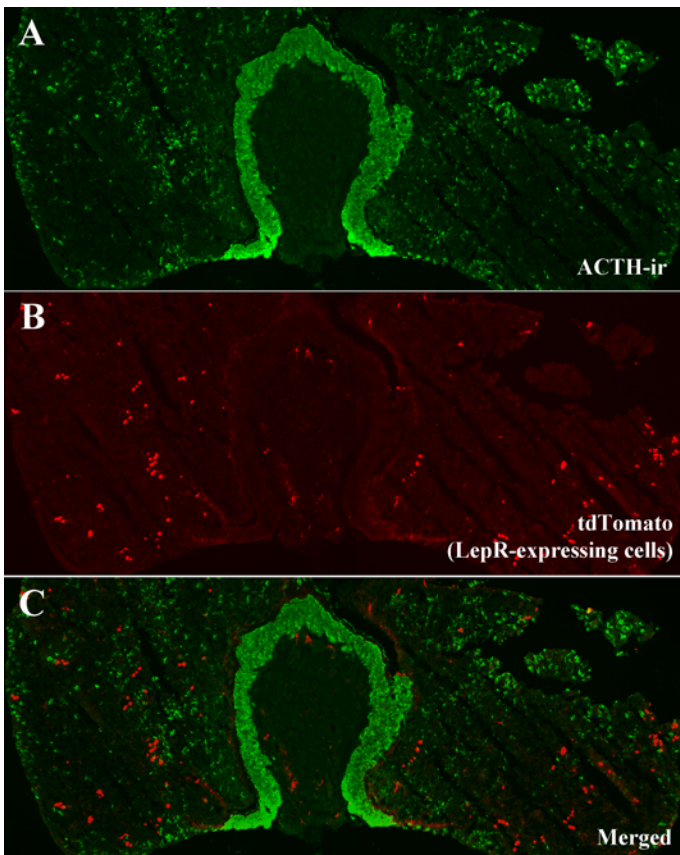

**Supplemental Figure 2** - Adrenocorticotrophic hormone immunoreactive (ACTH-ir) cells do not express leptin receptors (LEPR) in the pituitary of male mice. ACTH-ir cells were immunostained (A) in pituitary sections (20  $\mu$ m) to detect possible co-localization with the reporter protein tdTomato (B), expressed after Cre-induced recombination in the LEPR-Cre/tdTomato-floxed mice. As can be observed in the merged figure (C), virtually no co-localization was detected.
